# Supplementary material for: What Are the Risk Factors for Mechanical Failure in Spinal Arthrodesis? An Observational Study
Source: Preprints.org preprint supplement (doi:10.20944/preprints202311.1200.v1), 2023-11-22
Supplement: Supplementary file 1 [file supplementary]

Table 1: patient’s characteristics. Data were n (%) for categorical variables and pct25/median/pct75 for continuous variables

| **Variable** | | **Total**  **N=237** | **Not mechanical failure**  **N=225** | **Mechanical failure**  **N=12** |
| --- | --- | --- | --- | --- |
|  | |  | |  |
| Age, median (IQR) | | 20.5-47-62.5 | 46 (42) | 60.5 (35) |
| Sex | Female | 157 (66.2) | 151 (67.1) | 6 (50) |
| Men | 80 (33.8) |  |  |
| Body Mass Index (BMI), median (IQR) | | 20-23-27 | 23 (7) | 26 (12) |
| Smoking | Yes | 64 (27) | 60 (26.7) | 4 (33.3) |
| No | 173 (73) |  |  |
| Diabetes | Yes | 14 (5.9) | 12 (5.3) | 2 (16.7) |
| No | 223 (94.1) |  |  |
| Depression | Yes | 25 (10.5) | 23 (10.2) | 2 (16.7) |
| No | 212 (89.5) |  |  |
| Osteoporosis | Yes | 26 (11) | 23 (10.2) | 3 (25) |
| No | 211 (89) |  |  |
| ASA Score, median (IQR) | | 1-2-2 | 2 (1) | 2.5 (1) |
| Anamnesis of Spine surgery | Yes | 48 (20.3) | 42 (18.7) | 6 (50) |
| No | 189 (79.7) |  |  |
| Diagnosis   - Scoliosis - Discopathies - Stenosis - Spondylolisthesis - Other (fractures/..) | |  |  |  |
| 112 (47.3) | 107 | 5 |
| 45 (19.0) | 43 | 2 |
| 26 (11.0) | 25 | 1 |
| 27 (11.4) | 26 | 1 |
| 27 (11.4) | 24 | 3 |
| Time operation (hours), median (IQR) | | 3-4-4 | 4 (1) | 3.5 (4) |
| Surgery access | Posterior | 221 (93.2) | 211 (93.8) | 10 (83.3) |
| other | 16 (6.8) |  |  |
| Nr fused levels, median (IQR) | | 2-5-12 | 5 (10) | 8 (10) |
| Lumbosacral arthrodesis | Yes | 81 (34.2) | 77 (34.2) | 4 (33.3) |
| No | 156 (65.8) |  |  |
| Free walking recovery at discharge | Yes | 50 (21.1) | 41 (18.2) | 9 (75) |
| No |  |  |  |
| Time from surgery to recovery ambulation, median (IQR) | | 2-3-5 | 3 (3) | 4.5 (6) |

Table2. Logistic regression for 1-year failure. Factors included according to a backward* procedure with a p-for removal fixed at 0.157.

|  | | Wald | Sig. | Exp(B) | 95% CI per EXP(B) | |
| --- | --- | --- | --- | --- | --- | --- |
| Lower | Upper |
|  | Time operation | 2,442 | ,006 | 1,273 | ,940 | 1,723 |
| ASA score | 2,250 | ,134 | 2,396 | ,765 | 7,506 |
| Free walking recovery at discharge | 7,351 | ,077 | 7,863 | 1,771 | 34,914 |
